# Supplementary material
Source: Springer Nature journal article supplement (https://www.springermedizin.de/resource/supplementary/12990_2009_199_MOESM4_ESM.pdf/9612770)

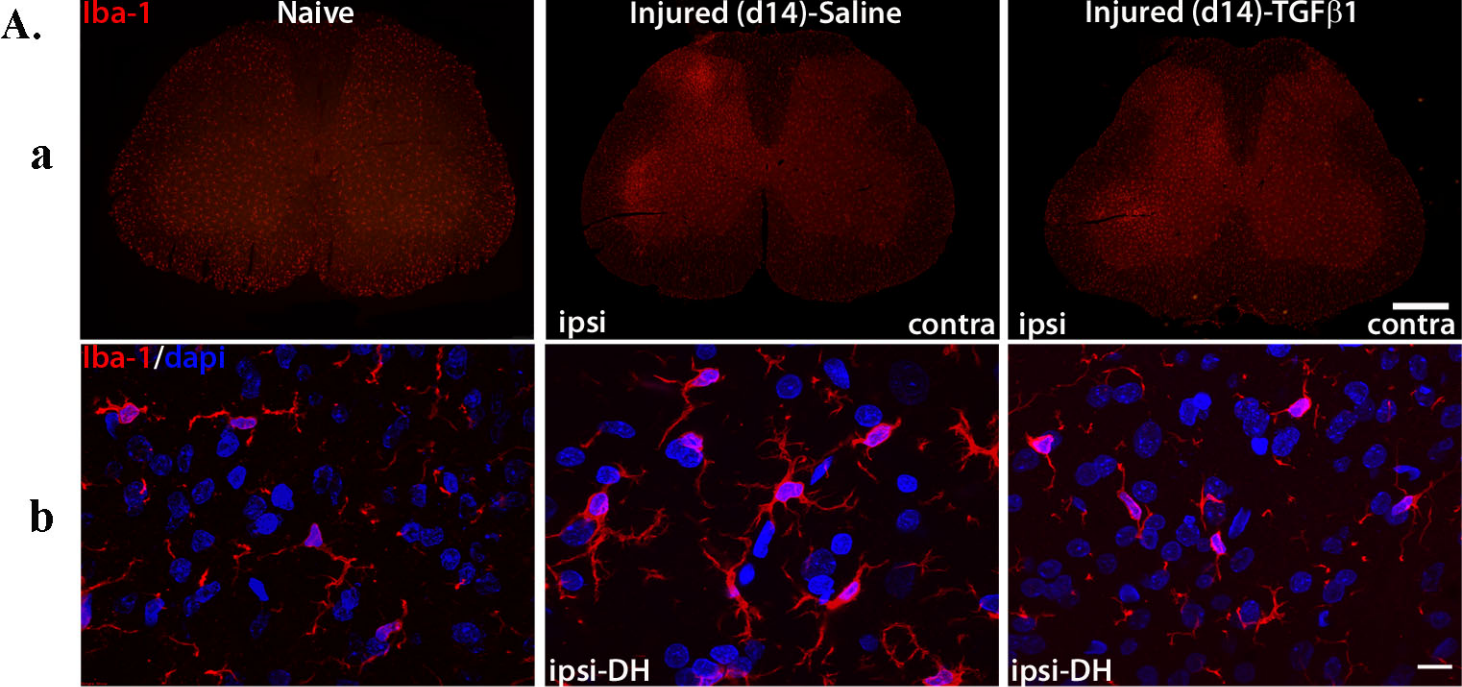

**B.**

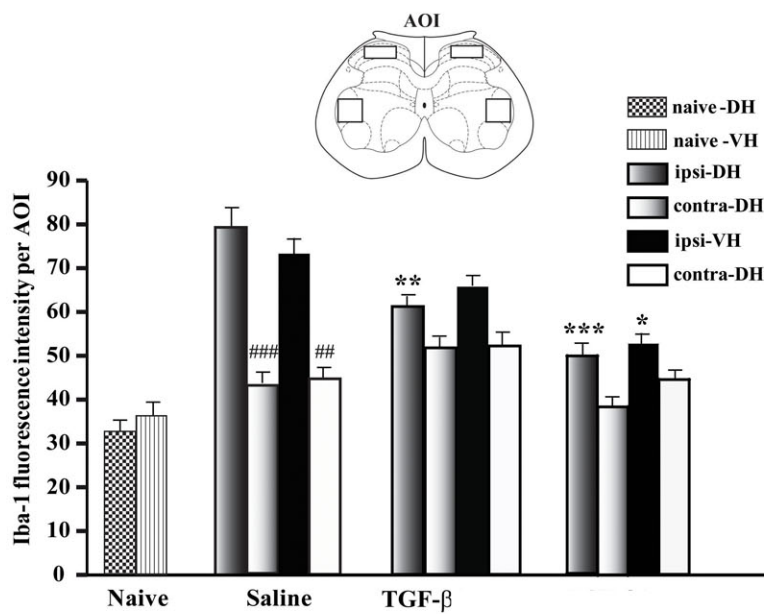

**C.**

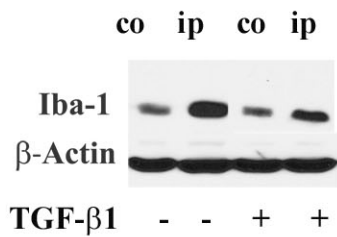

**D.**

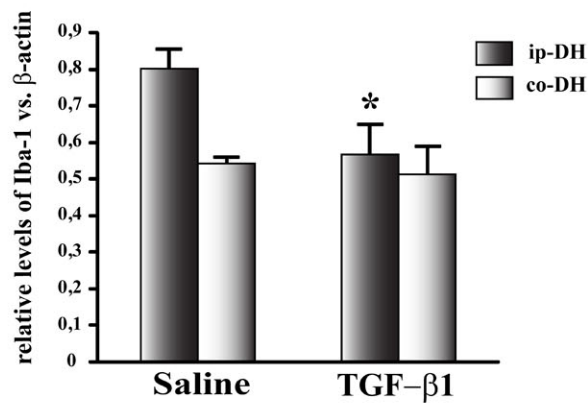

Supplement: MOESM4 [file 9612770]
